# Supplementary material for: Trace detection of methcathinone in sewage using targeted extraction based on magnetic molecularly imprinted polymers coupled with liquid chromatography-tandem mass spectrometry
Source: Royal Society of Chemistry journal article supplement (doi:10.1039/d3ay01224g), 2023-01-01
Supplement: d3ay01224g1.pdf [file d3ay01224g1.pdf]

1 *Analytical Methods*

2 **Supporting Information**

3  
4 **Trace detection of methcathinone in sewage using targeted extraction based on**  
5 **magnetic molecularly imprinted polymers coupled to liquid chromatography-**  
6 **tandem mass spectrometry**

7  
8 *Jiang Ling*<sup>a</sup>, *Wenqi Zhang*<sup>b</sup>, *Ping Xiang*<sup>c</sup>, *Yingyuan Liao*<sup>a</sup>, *Jiahao Li*<sup>a</sup>, *Zhihua Zhang*<sup>d</sup>, *YanJun*  
9 *Ding*<sup>a\*</sup>

10  
11 <sup>a</sup> Department of Forensic Science, School of Basic Medical Sciences, Central South University,  
12 410013, Changsha, Hunan, China

13 <sup>b</sup> Hebei Province Public Security Department Criminal Police Corps, Shijiazhuang, Hebei, china

14 <sup>c</sup> Shanghai Key Lab of Forensic Medicine, Key Lab of Forensic science, Ministry of Justice, China

15 <sup>d</sup> Shaoyang No.10 school, Hunan, China

16 \* E-mail address: [dingyanjun@csu.edu.cn](mailto:dingyanjun@csu.edu.cn)

## 24 **Part 1. Experimental**

### 25 1.1 Materials and instrumentation

26 Hexahydrate ferric chloride ( $\text{FeCl}_3 \cdot 6\text{H}_2\text{O}$ ), Ferrous chloride tetrahydrate ( $\text{FeCl}_2 \cdot 6\text{H}_2\text{O}$ ), 3-  
27 aminopropyltriethoxysilane (APTES), tetraethyl orthosilicate (TEOS), ethanol, acetic acid, polymer  
28 poly (acrylic acid, PAA), ammonium acetate, acetonitrile, formic acid and ammonium hydroxide  
29 ( $\text{NH}_3 \cdot \text{H}_2\text{O}$ ) were purchased from Aladdin Reagent Co., Ltd. (Shanghai, China). Cathinone,  
30 methamphetamine, ketamine, methcathinone, morphine, cocaine and amphetamine were supplied by  
31 the institute of criminal science and technology of Changsha Public Security Bureau. All chemicals  
32 commercially available are of analytical grade. All aqueous solutions were prepared with ultrapure  
33 water ( $18.2 \text{ M}\Omega \cdot \text{cm}$ , Millipore).

34 Fourier transform infrared spectra (FT-IR) were performed on 850 spectrophotometer (Tianjin  
35 Gangdong SCI.&TECH. CO.,LTD). Transmission electron microscopy (TEM) imaging was  
36 performed with HT7800 Hitachi TEM system at 300 kV. AB SCIEX TRIPLE QUAD™ 5500+ (LC-  
37 MS/MS) was employed to quantify methcathinone.

38 LC-MS/MS conditions were as follows: mobile phase: 20 mmol ammonium acetate in  
39 acetonitrile and 0.1% formic acid in ultrapure water (70:30). Separation performed on a Zorbax  
40 Eclipse Plus C18 column (150 mm $\times$ 2.1 mm, 3.5  $\mu\text{m}$ ) (Agilent, America). Injection volume: 5  $\mu\text{L}$ .  
41 Elution was performed at a flow rate gradient of 0.25 mL/min for 10 minutes with the column oven  
42 temperature was set to 40 °C. Mass spectrometric conditions: electrospray ionization positive ion  
43 mode (ESI+). Vcap: 4500 v; drying gas: nitrogen with flow rate at 10 L/min, temperature 500 °C;  
44 Collision gas: Helium, collision energy: 10/22 v. Declustering potential: 85 V for methcathinone.  
45 Precursor/product ion: 164/146 (CE: 10v), 164/130 (CE: 34v) for methcathinone.

46

## 47 **Part 2. Experiment**

### 48 2.1 Synthesis of $\text{Fe}_3\text{O}_4$

49 Briefly, 10 mg PAA was dispersed in 30 mL ultrapure water in 100 mL three-necked flask and  
50 then deoxidized with nitrogen flow for 30 minutes and heated to 75 °C according to the literatures.  
51 Meanwhile, 0.584 g  $\text{FeCl}_3 \cdot 6\text{H}_2\text{O}$  and 0.222 g  $\text{FeCl}_2 \cdot 4\text{H}_2\text{O}$  dispersed into 1 mL diluted hydrochloric

52 acid (1 M). The mixed iron precursor was then quickly injected into the hot polymer solution with  
53 violently stirred under nitrogen atmosphere, and then added with 15 mL  $\text{NH}_3 \cdot \text{H}_2\text{O}$  (28%) to adjust  
54 pH. The solution turned black immediately upon addition of ammonia and the resulting mixtures  
55 were refluxed for 40 minutes at 75 °C. After cooling down, the black product was washed by  
56 ultrapure water and ethanol three times with the aid of external magnetic field and dried at 60 °C for  
57 4 h.

## 58 2.2 Preparation of silica coated $\text{Fe}_3\text{O}_4$

59 The nano-sized magnetic  $\text{Fe}_3\text{O}_4$  was synthesized by modified high temperature coprecipitation  
60 approach according to literature. Then, 20 mg  $\text{Fe}_3\text{O}_4\text{NPs}$  were dispersed into a mixture containing 12  
61 mL ethanol and 3 mL water and ultrasonicated for 20 minutes. Then 0.1 mL  $\text{NH}_3 \cdot \text{H}_2\text{O}$  and 0.3 mL  
62 TEOS were added into the mixture and vibrated for 12 h at room temperature. The obtained  
63  $\text{Fe}_3\text{O}_4\text{NPs}@ \text{SiO}_2$  was washed with hydrochloric acid (1 M), ethanol and ultrapure water to remove  
64 incomplete products with the help of external magnetic and then dried at 60 °C for 4 h.

66 Part 2. Figures and tables

67

68

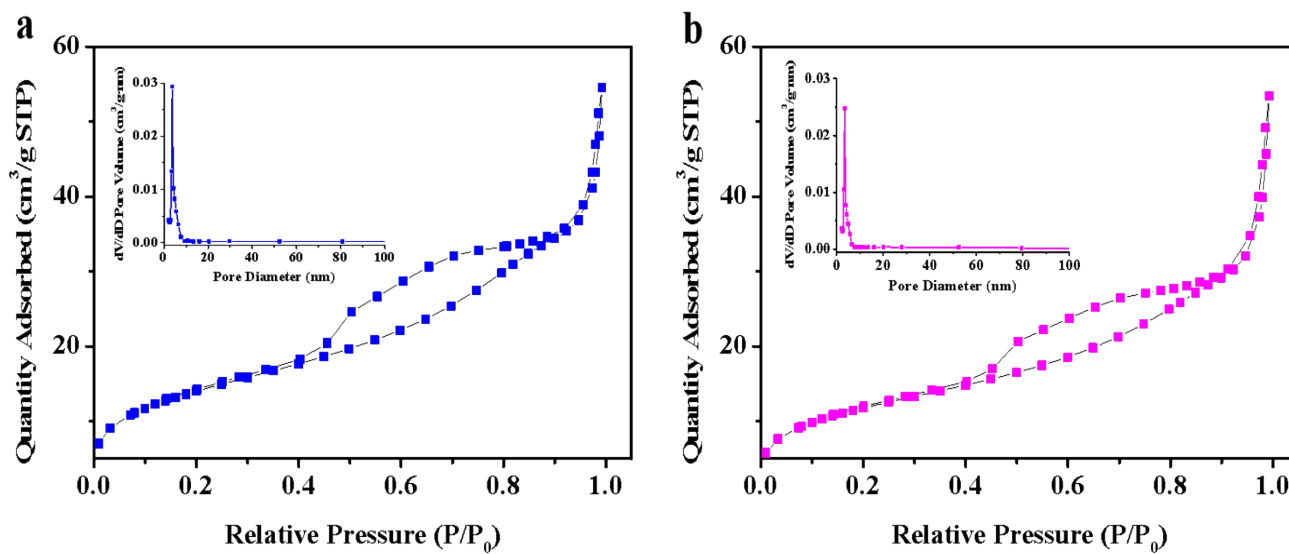

69

70

71

Fig. S1. N<sub>2</sub> adsorption/desorption isotherms of (a) MMIPs and (b) MNIPs

73

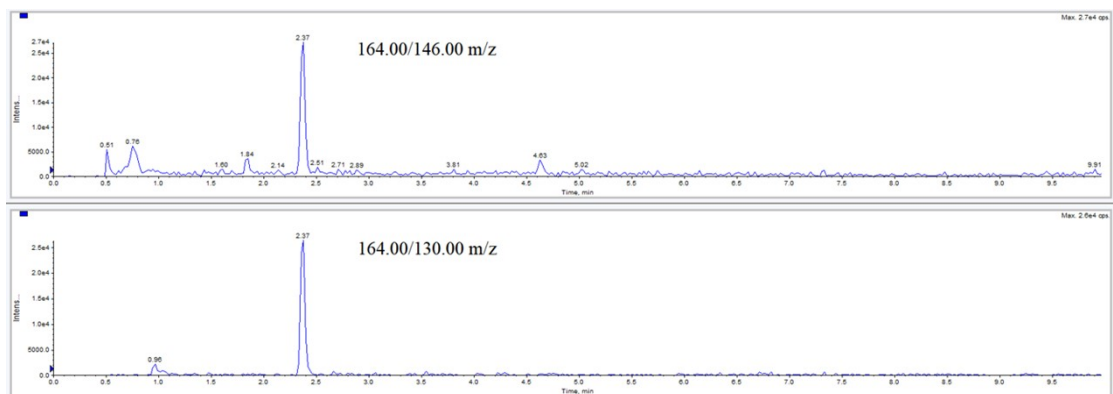

74

75

76 **Fig. S2.** The precursor/product ions of methcathinone by LC-MS/MS.

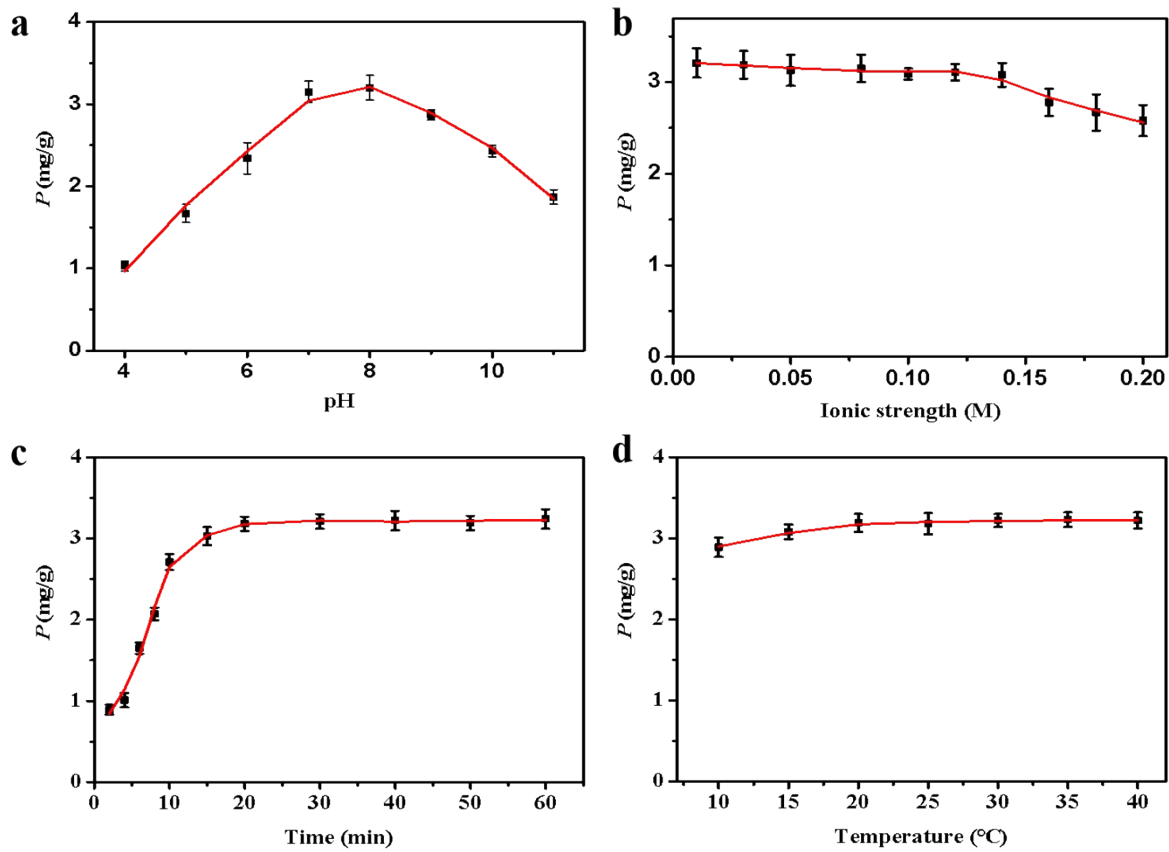

78

79

**Fig. S3.** Effect of experimental parameters on the performance of MMIPs for methcathinone

80

adsorption: (a) pH, (b) ionic strength, (c) incubation time and (d) Temperature.

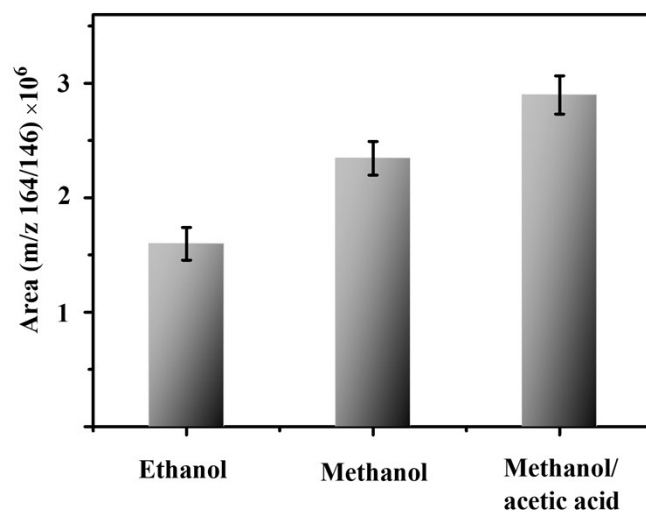

81

82 **Fig. S4.** Comparison of the effects of different elution solvents: methanol, ethanol,

83 methanol/acetic acid with 9:1 mixture.

84

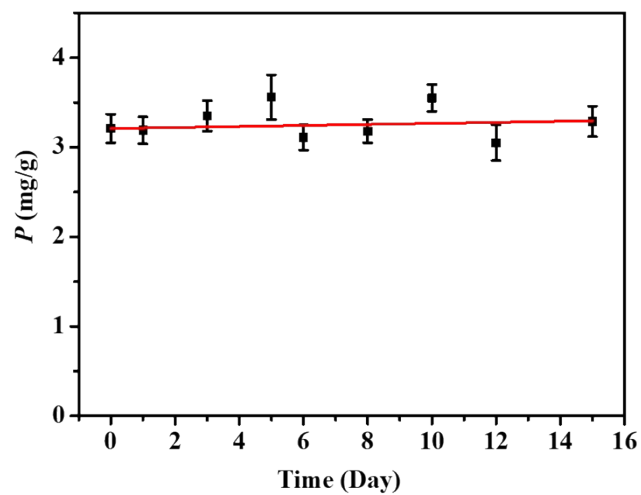

86

87 **Fig. S5.** The stability of MMIPs: the trend of adsorption properties of MMIPs within 15 days  
88 under the same conditions.

89

90

91

92

93

94



96 **Table S1.** Specific surface area, volume and pore size of synthesized materials.

97

|      | Pore size / nm | Surface area / m <sup>2</sup> g <sup>-1</sup> | Pore volume / cm <sup>3</sup> g <sup>-1</sup> |
|------|----------------|-----------------------------------------------|-----------------------------------------------|
| MMIP | 7.8875         | 50.8283                                       | 0.084370                                      |
| MNIP | 7.7272         | 40.9744                                       | 0.082571                                      |

98

99

100

101

102

103 **Table S2.** Validation of methcathinone of spiked samples by the developed MSPE/LC-MS/MS

| Sample     | Added (ng/L) | Found* (ng/L) | Recovery (%) | precision RSD (% , n = 3) |           |
|------------|--------------|---------------|--------------|---------------------------|-----------|
|            |              |               |              | Intra-day                 | Inter-day |
|            | 20           | 23.34         | 116.7        | 4.77                      | 6.89      |
| Wastewater | 100          | 96.35         | 96.35        | 3.98                      | 5.33      |
|            | 1000         | 1089.23       | 108.9        | 3.15                      | 4.68      |

104 \* Mean of three determinations

105
